# Supplementary material for: An efficient epoxidation of terminal aliphatic alkenes over heterogeneous catalysts: when solvent matters
Source: Royal Society of Chemistry journal article supplement (doi:10.1039/c5cy01639h), 2015-12-21
Supplement: c5cy01639h1.pdf [file c5cy01639h1.pdf]

## Electronic Supplementary Information

### An efficient epoxidation of terminal aliphatic alkenes over heterogeneous catalysts: when solvent matters

C. Palumbo,<sup>a</sup> C. Tiozzo,<sup>a</sup> N. Ravasio,<sup>a</sup> R. Psaro,<sup>a</sup> F. Carniato,<sup>b</sup> C. Bisio<sup>a,b</sup> and M. Guidotti<sup>\*a</sup>

<sup>a</sup>CNR-Istituto di Scienze e Tecnologie Molecolari, Via C. Golgi 19, 20133 Milano, Italy.

<sup>b</sup>Dipartimento di Scienze e Innovazione Tecnologica and Nano-SISTEMI Interdisciplinary Centre, Università del Piemonte Orientale "A. Avogadro", Viale Teresa Michel 11, 15121 Alessandria Italy.

E-mail: [m.guidotti@istm.cnr.it](mailto:m.guidotti@istm.cnr.it)

#### Table of contents:

N<sub>2</sub> physisorption analysis of catalysts (**Fig. S1, S2, S3**)

- adsorption/desorption isotherms
- pore size distributions

X-ray diffractograms of MCM-41 support and Ti/MCM-41 catalyst (**Fig. S4**)

Diffuse reflectance UV–Vis (DR UV–Vis) spectra (**Fig. S5**)

Heterogeneity tests (**Fig. S6**)

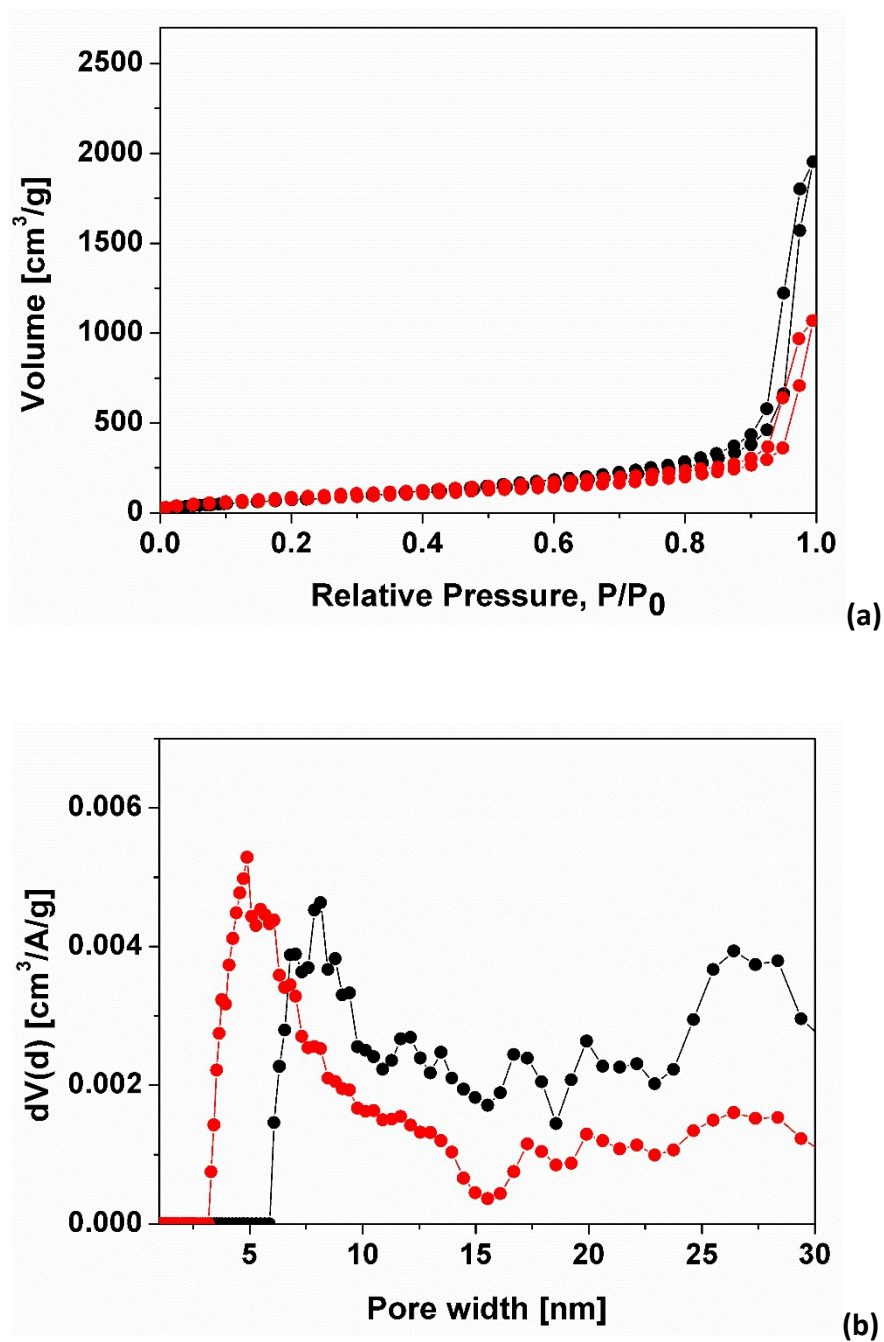

**Fig. S1.** (a) N<sub>2</sub> adsorption–desorption isotherms at 77 K, for SiO<sub>2</sub>-Aero (black) and Ti/SiO<sub>2</sub>-Aero (red); (b) pore size distributions obtained by NLDFT of SiO<sub>2</sub>-Aero (black) and Ti/SiO<sub>2</sub>-Aero (red)

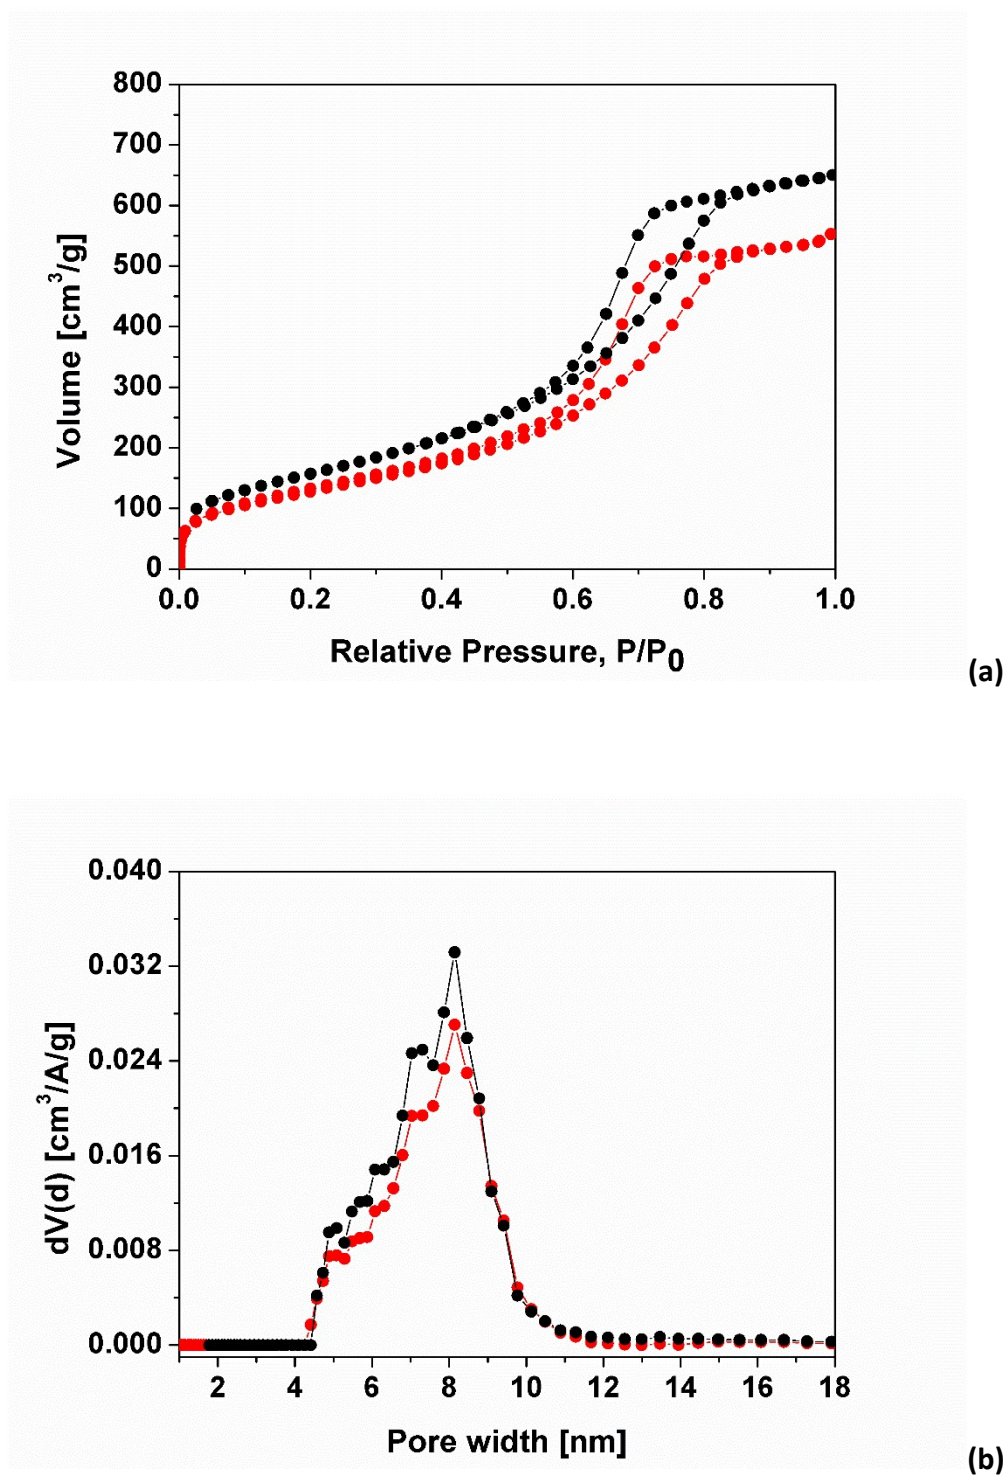

**Fig. S2.** (a) N<sub>2</sub> adsorption–desorption isotherms at 77 K, for SiO<sub>2</sub>-Dav (black) and Ti/SiO<sub>2</sub>-Dav (red); (b) pore size distributions obtained by NLDFT of SiO<sub>2</sub>-Dav (black) and Ti/SiO<sub>2</sub>-Dav (red)

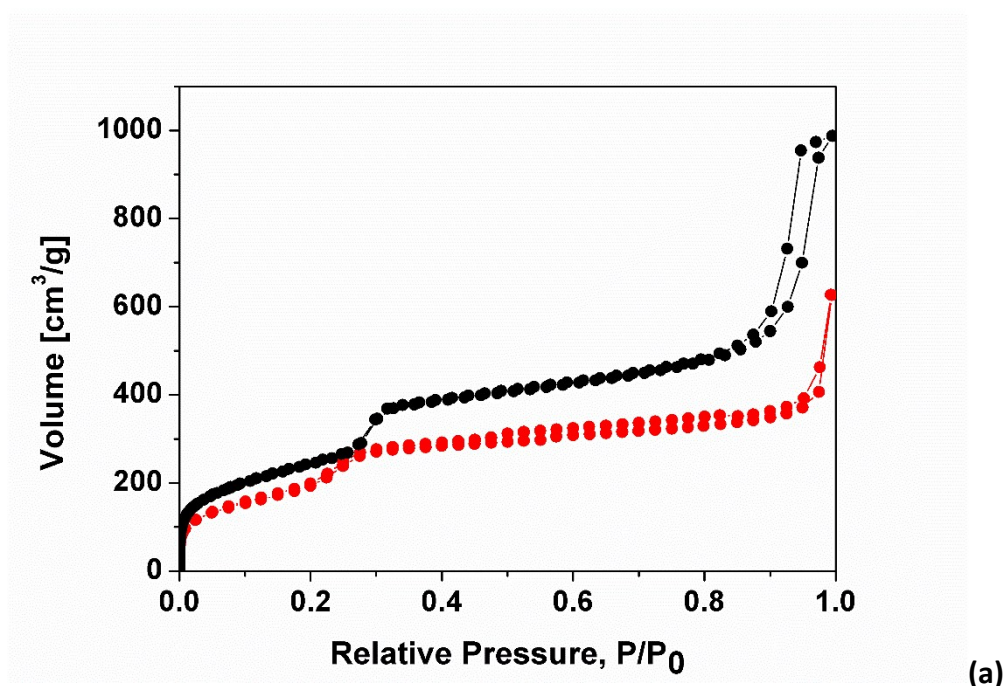

(a)

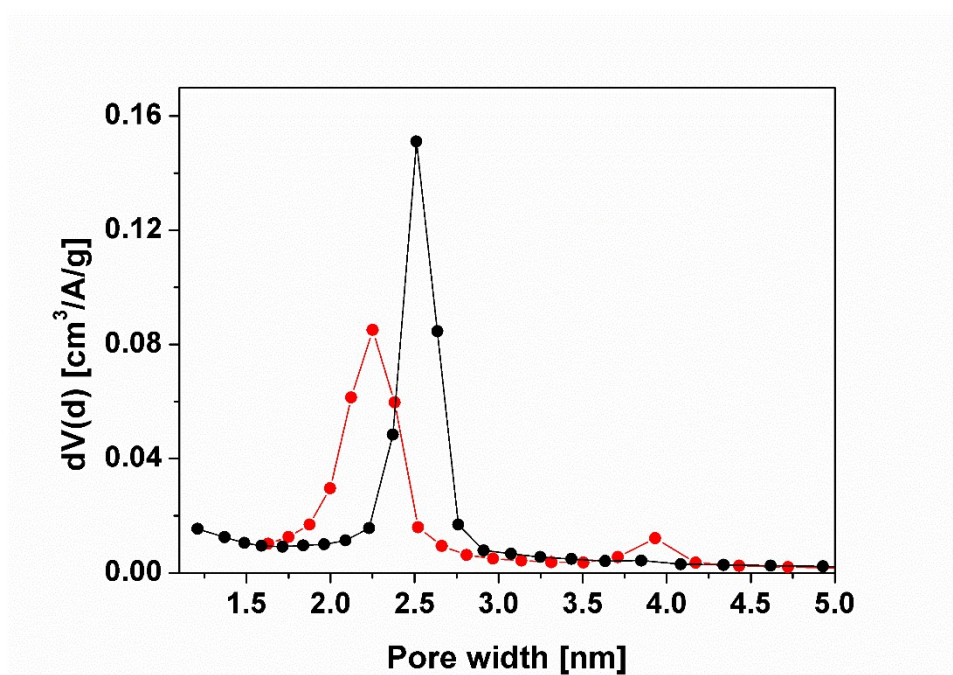

(b)

**Fig. S3.** (a) N<sub>2</sub> adsorption–desorption isotherms at 77 K, for MCM-41 (black) and Ti/MCM-41 (red); (b) pore size distributions obtained by BJH method of MCM-41 (black) and Ti/MCM-41 (red)



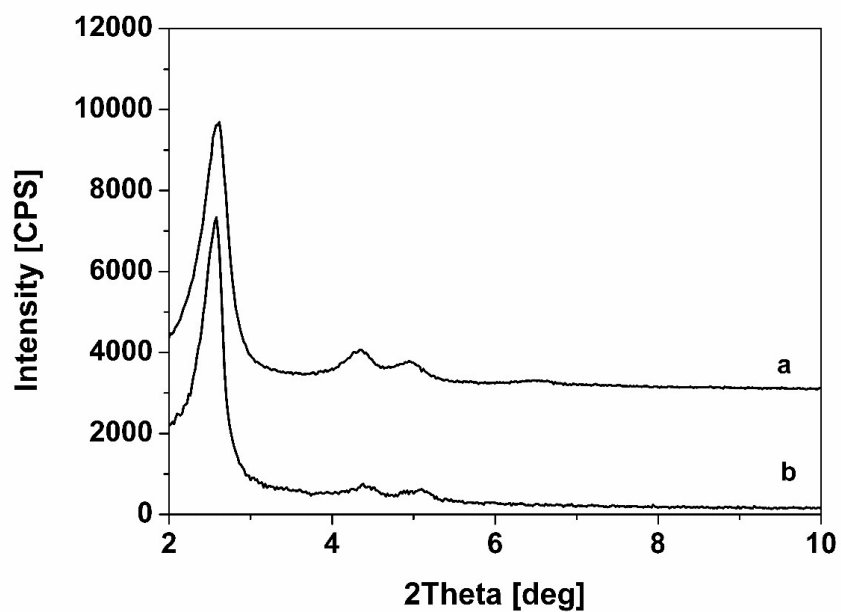

**Fig. S4.** X-ray diffraction patterns for MCM-41 support (curve a) and Ti/MCM-41 catalyst (curve b).

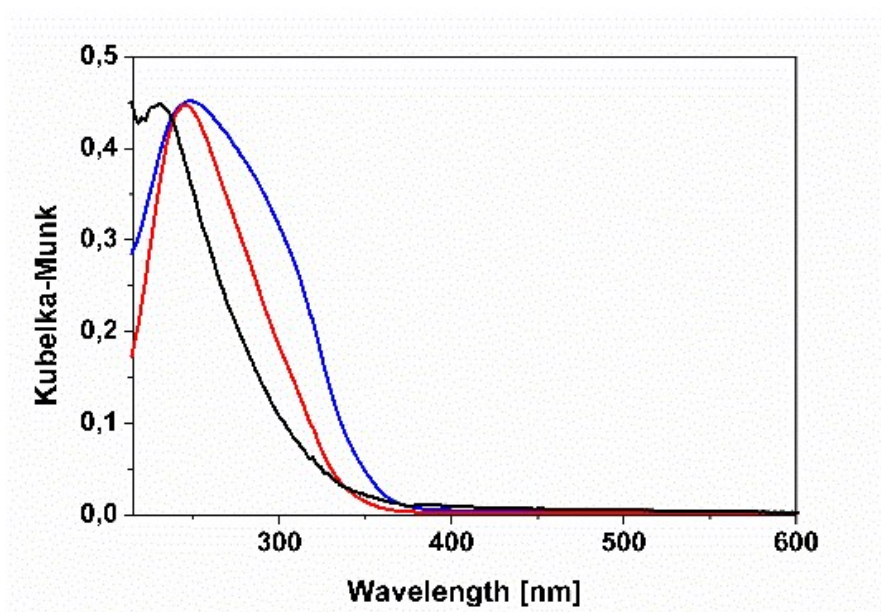

**Fig. S5.** Normalized DR UV-Vis spectra of Ti/MCM-41 (black curve), Ti/SiO<sub>2</sub>-Aero (red curve) and Ti/SiO<sub>2</sub>-Dav (blue curve). All samples were calcined at 773 K under dry air and, prior to the DRS UV-Vis analysis, dispersed in anhydrous BaSO<sub>4</sub> (10 wt.%) and treated *in vacuo* for 1h at room temperature.

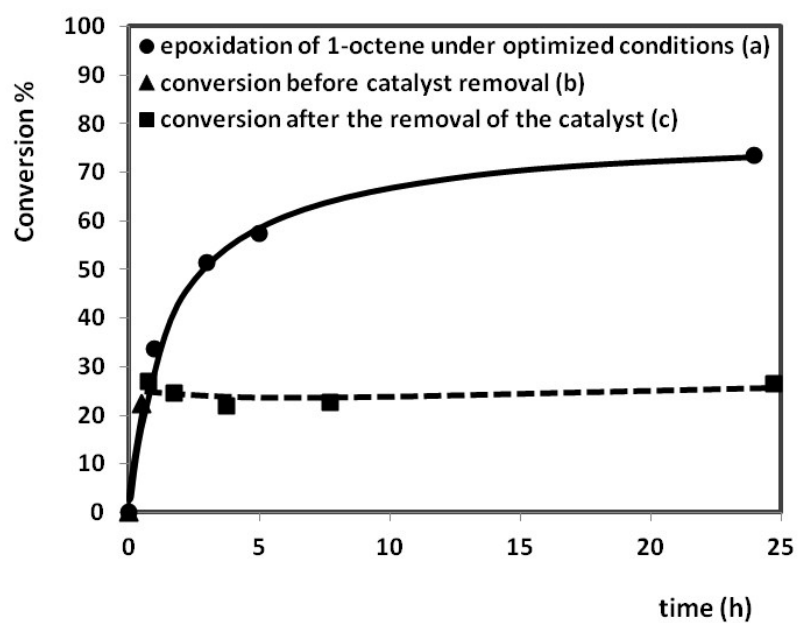

**Fig. S6.** Conversion profiles for the epoxidation of 1-octene over Ti/SiO<sub>2</sub>-Dav, under optimized conditions (curve a) and in the heterogeneity test, before (curve b) and after (curve c) the removal of the solid catalyst *via* centrifugation.
